# Supplementary material for: Selective photothermal ablation of cancer cells by patterned gold nanocages using surface acoustic waves
Source: Royal Society of Chemistry journal article supplement (doi:10.1039/c9lc00344d), 2019-01-01
Supplement: c9lc00344d1.pdf [file c9lc00344d1.pdf]

## Supporting Figures

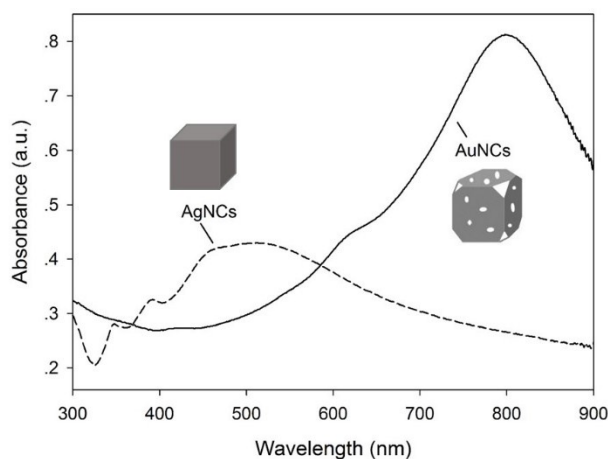

**Figure S1.** The absorption spectrum of the AgNCs (dashed line) and the AuNCs (solid line) measured by the UV-Vis-NIR spectroscopy.

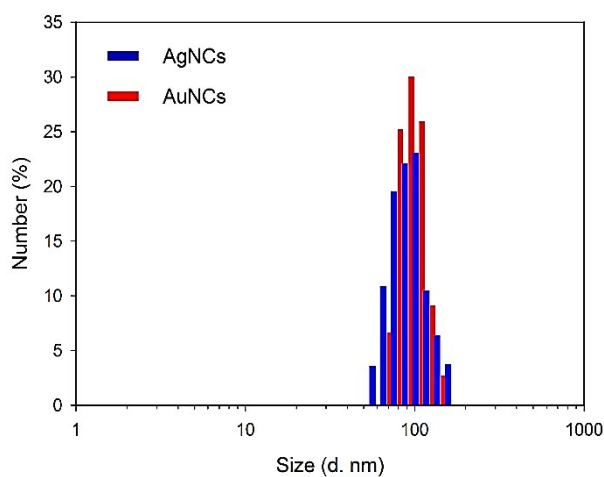

**Figure S2.** The size distribution of the AgNCs and AuNCs characterized by dynamic light scattering.

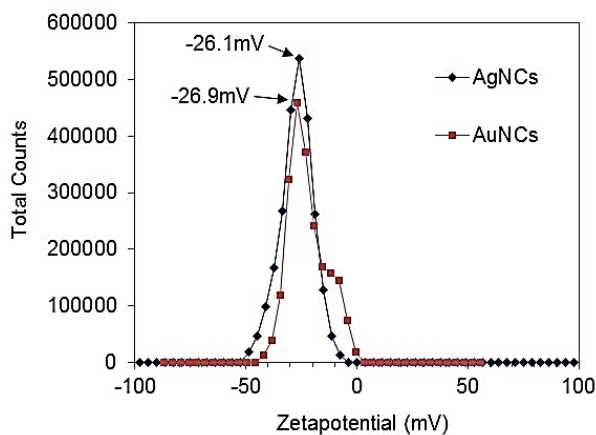

**Figure S3.** The zeta potential distribution of the AgNCs and AuNCs characterized by phase analysis light scattering.

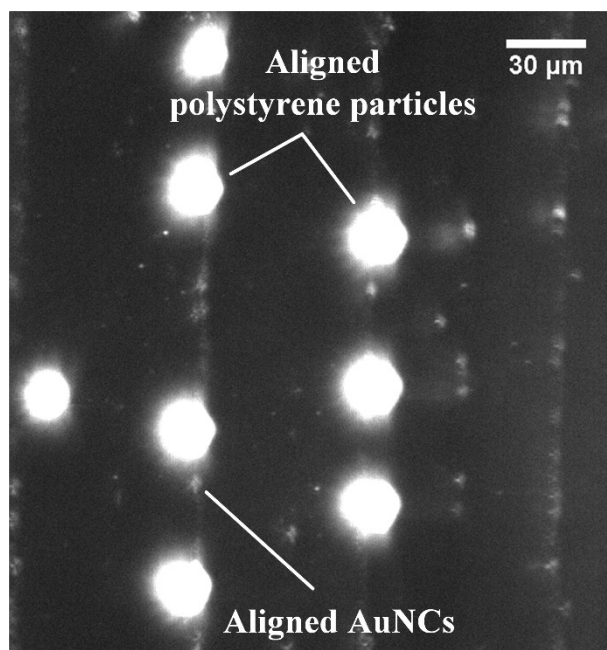

**Figure S4.** AuNCs are trapped at the same plane with polystyrene particles.

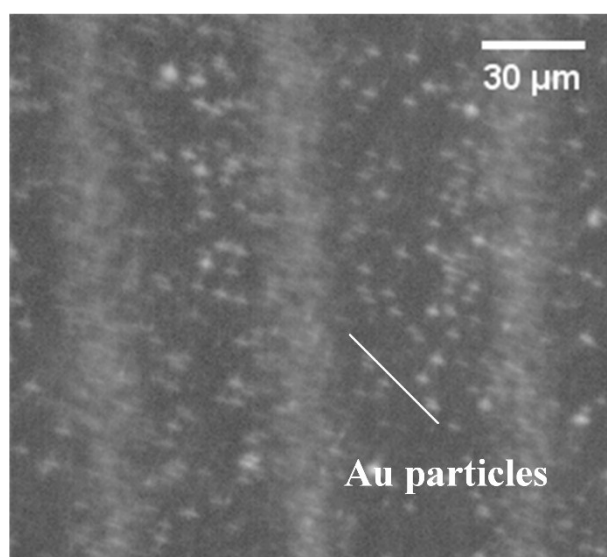

**Figure S5.** Au particles are patterned by the acoustic radiation force when increasing the input power to 180 mW.

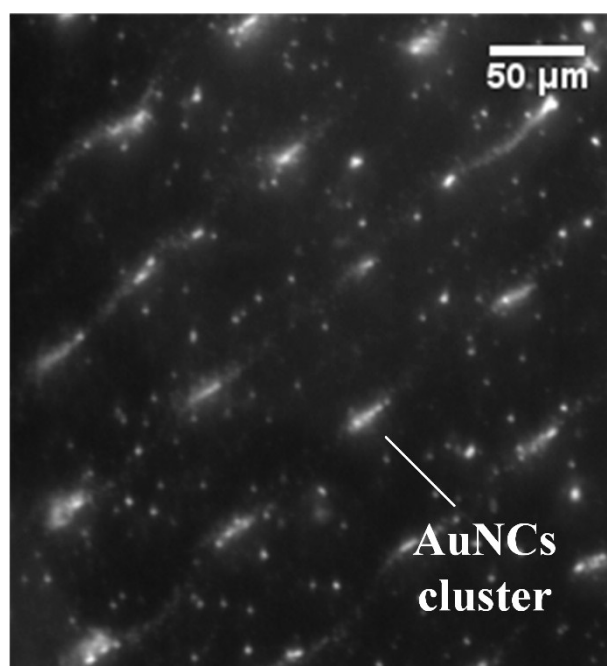

**Figure S6.** In one-dimensional SSAWs field, the AuNCs are aggregated by the secondary acoustic radiation force, forming a “pearl chain”.

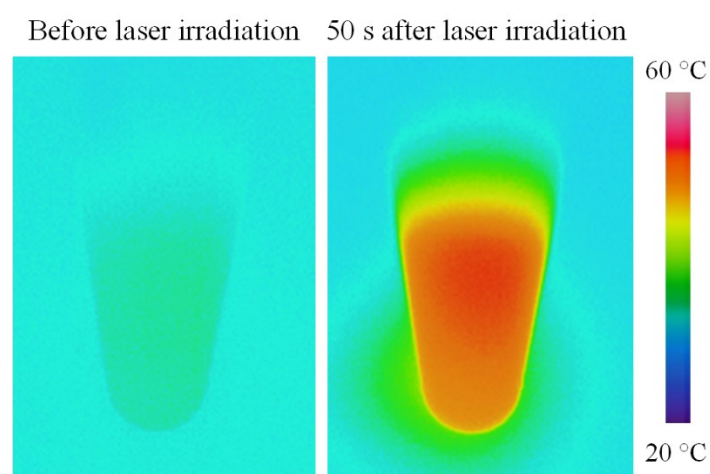

**Figure S7.** When the AuNCs are exposed to laser irradiation (2 W/cm<sup>2</sup>), temperature increases dramatically.
